# Supplementary material
Source: Springer Nature journal article supplement (https://www.springermedizin.de/resource/supplementary/12906_2010_291_MOESM1_ESM.pdf/9519344)
Supplement: MOESM1 [file 9519344]

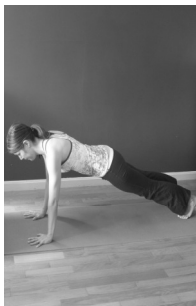

(1) Exhale  
Plank Inhale

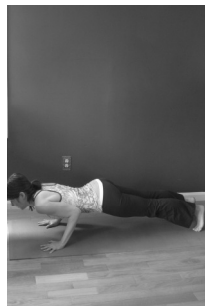

(2) Exhale  
Chaturanga  
Dandasana

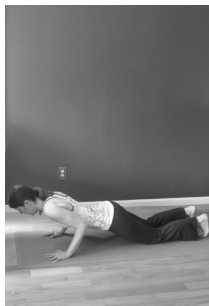

(2a Modification)  
Chaturanga  
Dandasana

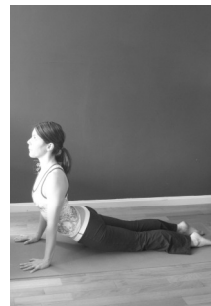

(3) Inhale  
Urdhva Mukha  
Svanasana

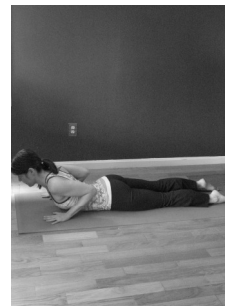

(3a Modification)  
(Variation)  
Bhujangasana

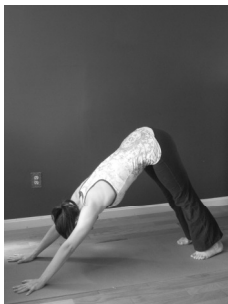

(4) Exhale  
AdhoMukha  
Svanasana

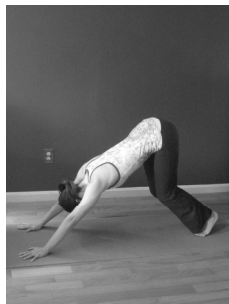

(4a Modification)  
AdhoMukha  
Svanasana

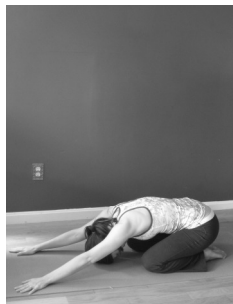

(4a Modification)  
(Variation)  
Balasana
